# Supplementary material for: Human Health Risk Assessment of Air Pollution in the Regions of Unsustainable Heating Sources. Case Study—The Tourist Areas of Southern Poland
Source: MDPI journal article supplement (doi:10.3390/atmos12050615), 2021-05-10
Supplement: s1 [file s1]

## Supplementary Materials:

Agnieszka Gruszecka-Kosowska <sup>1,\*</sup>, Jacek Dajda <sup>2</sup>, Ewa Adamiec <sup>1</sup>, Edeltrauda Helios-Rybicka <sup>1</sup>, Marek Kisiel-Dorohinicki <sup>2</sup>, Radosław Klimek <sup>3</sup>, Dariusz Pałka <sup>3</sup> and Jarosław Wąs <sup>3</sup>

**Table S1.** Estimated average daily dose (ADD) values in inhalation pathway, in reference to exposure scenarios in the study.

| Tourist location | Location number | Resident        |          |          |          | Tourist  |          |
|------------------|-----------------|-----------------|----------|----------|----------|----------|----------|
|                  |                 | Adult           | Child    | Infant   | Adult    | Child    | Infant   |
|                  |                 | ADD (mg/kg-day) |          |          |          |          |          |
| CO               |                 |                 |          |          |          |          |          |
| Maniowy          | 1               | 4.25E-03        | 6.94E-03 | 6.81E-03 | 7.21E-04 | 1.18E-03 | 1.16E-03 |
| Łapsze Wyżne     | 2               | 6.84E-03        | 1.12E-02 | 1.10E-02 | 1.16E-03 | 1.90E-03 | 1.86E-03 |
| Frydman          | 3               | 3.86E-03        | 6.30E-03 | 6.18E-03 | 6.55E-04 | 1.07E-03 | 1.05E-03 |
| Klikuszowa       | 4               | 2.67E-03        | 4.36E-03 | 4.28E-03 | 4.54E-04 | 7.41E-04 | 7.27E-04 |
| Jurgów           | 5               | 6.93E-03        | 1.13E-02 | 1.11E-02 | 1.18E-03 | 1.92E-03 | 1.89E-03 |
| Huba             | 6               | 4.17E-03        | 6.81E-03 | 6.68E-03 | 7.08E-04 | 1.16E-03 | 1.13E-03 |
| Ludźmierz        | 7               | 4.08E-03        | 6.66E-03 | 6.53E-03 | 6.93E-04 | 1.13E-03 | 1.11E-03 |
| Kacwin           | 8               | 6.15E-03        | 1.00E-02 | 9.85E-03 | 1.04E-03 | 1.71E-03 | 1.67E-03 |
| Dębno            | 9               | 7.67E-03        | 1.25E-02 | 1.23E-02 | 1.30E-03 | 2.13E-03 | 2.09E-03 |
| Czorsztyn        | 10              | 3.13E-03        | 5.11E-03 | 5.01E-03 | 5.31E-04 | 8.68E-04 | 8.51E-04 |
| Niedzica         | 11              | 6.81E-03        | 1.11E-02 | 1.09E-02 | 1.16E-03 | 1.89E-03 | 1.85E-03 |
| Waksmund         | 12              | 7.10E-03        | 1.16E-02 | 1.14E-02 | 1.21E-03 | 1.97E-03 | 1.93E-03 |
| O <sub>3</sub>   |                 |                 |          |          |          |          |          |
| Maniowy          | 1               | 1.15E-03        | 1.88E-03 | 1.84E-03 | 1.95E-04 | 3.19E-04 | 3.13E-04 |
| Łapsze Wyżne     | 2               | 1.06E-03        | 1.73E-03 | 1.70E-03 | 1.80E-04 | 2.94E-04 | 2.88E-04 |
| Frydman          | 3               | 1.12E-03        | 1.83E-03 | 1.80E-03 | 1.91E-04 | 3.11E-04 | 3.05E-04 |
| Klikuszowa       | 4               | 1.33E-03        | 2.17E-03 | 2.13E-03 | 2.25E-04 | 3.68E-04 | 3.61E-04 |
| Jurgów           | 5               | 1.18E-03        | 1.94E-03 | 1.90E-03 | 2.01E-04 | 3.29E-04 | 3.22E-04 |
| Huba             | 6               | 1.26E-03        | 2.06E-03 | 2.02E-03 | 2.14E-04 | 3.50E-04 | 3.44E-04 |
| Ludźmierz        | 7               | 1.01E-03        | 1.66E-03 | 1.63E-03 | 1.72E-04 | 2.82E-04 | 2.76E-04 |
| Kacwin           | 8               | 1.01E-03        | 1.65E-03 | 1.62E-03 | 1.71E-04 | 2.80E-04 | 2.75E-04 |
| Dębno            | 9               | 9.25E-04        | 1.51E-03 | 1.48E-03 | 1.57E-04 | 2.57E-04 | 2.52E-04 |
| Czorsztyn        | 10              | 1.29E-03        | 2.12E-03 | 2.07E-03 | 2.20E-04 | 3.59E-04 | 3.52E-04 |
| Niedzica         | 11              | 1.17E-03        | 1.92E-03 | 1.88E-03 | 1.99E-04 | 3.25E-04 | 3.19E-04 |
| Waksmund         | 12              | 1.13E-03        | 1.85E-03 | 1.82E-03 | 1.92E-04 | 3.14E-04 | 3.08E-04 |
| PM <sub>1</sub>  |                 |                 |          |          |          |          |          |
| Maniowy          | 1               | 3.49E-04        | 5.70E-04 | 5.59E-04 | 5.92E-05 | 9.68E-05 | 9.49E-05 |
| Łapsze Wyżne     | 2               | 3.63E-04        | 5.94E-04 | 5.82E-04 | 6.17E-05 | 1.01E-04 | 9.89E-05 |
| Frydman          | 3               | 2.76E-04        | 4.51E-04 | 4.42E-04 | 4.69E-05 | 7.66E-05 | 7.51E-05 |
| Klikuszowa       | 4               | 2.03E-04        | 3.31E-04 | 3.25E-04 | 3.44E-05 | 5.62E-05 | 5.51E-05 |
| Jurgów           | 5               | 3.15E-04        | 5.15E-04 | 5.05E-04 | 5.36E-05 | 8.75E-05 | 8.58E-05 |
| Huba             | 6               | 4.94E-04        | 8.06E-04 | 7.91E-04 | 8.38E-05 | 1.37E-04 | 1.34E-04 |
| Ludźmierz        | 7               | 4.22E-04        | 6.90E-04 | 6.77E-04 | 7.17E-05 | 1.17E-04 | 1.15E-04 |
| Kacwin           | 8               | 6.23E-04        | 1.02E-03 | 9.98E-04 | 1.06E-04 | 1.73E-04 | 1.70E-04 |
| Dębno            | 9               | 9.51E-04        | 1.55E-03 | 1.52E-03 | 1.62E-04 | 2.64E-04 | 2.59E-04 |
| Czorsztyn        | 10              | 2.97E-04        | 4.85E-04 | 4.76E-04 | 5.05E-05 | 8.25E-05 | 8.09E-05 |
| Niedzica         | 11              | 6.03E-04        | 9.86E-04 | 9.67E-04 | 1.02E-04 | 1.67E-04 | 1.64E-04 |
| Waksmund         | 12              | 6.32E-04        | 1.03E-03 | 1.01E-03 | 1.07E-04 | 1.75E-04 | 1.72E-04 |

**Table S2.** Calculated hazard quotient (HQ) values in inhalation pathway, in reference to exposure scenarios in the study.

| Tourist location | Location number | Resident          |       |        | Tourist |       |        |
|------------------|-----------------|-------------------|-------|--------|---------|-------|--------|
|                  |                 | Adult             | Child | Infant | Adult   | Child | Infant |
|                  |                 | HQ                |       |        |         |       |        |
|                  |                 | PM <sub>2.5</sub> |       |        |         |       |        |
| Maniowy          | 1               | 7.54              | 7.54  | 7.54   | 1.28    | 1.28  | 1.28   |
| Łapsze Wyżne     | 2               | 7.58              | 7.58  | 7.58   | 1.29    | 1.29  | 1.29   |
| Frydman          | 3               | 5.49              | 5.49  | 5.49   | 0.93    | 0.93  | 0.93   |
| Klikuszowa       | 4               | 3.97              | 3.97  | 3.97   | 0.67    | 0.67  | 0.67   |
| Jurgów           | 5               | 6.31              | 6.31  | 6.31   | 1.07    | 1.07  | 1.07   |
| Huba             | 6               | 11.06             | 11.06 | 11.06  | 1.88    | 1.88  | 1.88   |
| Ludźmierz        | 7               | 8.70              | 8.70  | 8.70   | 1.48    | 1.48  | 1.48   |
| Kacwin           | 8               | 12.66             | 12.66 | 12.66  | 2.15    | 2.15  | 2.15   |
| Dębno            | 9               | 19.05             | 19.05 | 19.05  | 3.24    | 3.24  | 3.24   |
| Czorsztyn        | 10              | 5.87              | 5.87  | 5.87   | 1.00    | 1.00  | 1.00   |
| Niedzica         | 11              | 11.87             | 11.87 | 11.87  | 2.02    | 2.02  | 2.02   |
| Waksmund         | 12              | 12.86             | 12.86 | 12.86  | 2.18    | 2.18  | 2.18   |
| PM <sub>10</sub> |                 |                   |       |        |         |       |        |
| Maniowy          | 1               | 0.129             | 0.211 | 0.207  | 0.022   | 0.036 | 0.035  |
| Łapsze Wyżne     | 2               | 0.053             | 0.086 | 0.084  | 0.009   | 0.015 | 0.014  |
| Frydman          | 3               | 0.030             | 0.049 | 0.048  | 0.005   | 0.008 | 0.008  |
| Klikuszowa       | 4               | 0.022             | 0.036 | 0.035  | 0.004   | 0.006 | 0.006  |
| Jurgów           | 5               | 0.035             | 0.056 | 0.055  | 0.006   | 0.010 | 0.009  |
| Huba             | 6               | 0.149             | 0.244 | 0.239  | 0.025   | 0.041 | 0.041  |
| Ludźmierz        | 7               | 0.063             | 0.102 | 0.100  | 0.011   | 0.017 | 0.017  |
| Kacwin           | 8               | 0.069             | 0.112 | 0.110  | 0.012   | 0.019 | 0.019  |
| Dębno            | 9               | 0.115             | 0.188 | 0.185  | 0.020   | 0.032 | 0.031  |
| Czorsztyn        | 10              | 0.033             | 0.055 | 0.053  | 0.006   | 0.009 | 0.009  |
| Niedzica         | 11              | 0.065             | 0.106 | 0.104  | 0.011   | 0.018 | 0.018  |
| Waksmund         | 12              | 0.074             | 0.121 | 0.119  | 0.013   | 0.021 | 0.020  |
| NO <sub>2</sub>  |                 |                   |       |        |         |       |        |
| Maniowy          | 1               | 0.074             | 0.121 | 0.119  | 0.013   | 0.021 | 0.020  |
| Łapsze Wyżne     | 2               | 0.076             | 0.124 | 0.121  | 0.013   | 0.021 | 0.021  |
| Frydman          | 3               | 0.075             | 0.123 | 0.120  | 0.013   | 0.021 | 0.020  |
| Klikuszowa       | 4               | 0.094             | 0.154 | 0.151  | 0.016   | 0.026 | 0.026  |
| Jurgów           | 5               | 0.099             | 0.162 | 0.159  | 0.017   | 0.028 | 0.027  |
| Huba             | 6               | 0.077             | 0.126 | 0.124  | 0.013   | 0.021 | 0.021  |
| Ludźmierz        | 7               | 0.071             | 0.115 | 0.113  | 0.012   | 0.020 | 0.019  |
| Kacwin           | 8               | 0.096             | 0.157 | 0.154  | 0.016   | 0.027 | 0.026  |
| Dębno            | 9               | 0.117             | 0.192 | 0.188  | 0.020   | 0.033 | 0.032  |
| Czorsztyn        | 10              | 0.139             | 0.226 | 0.222  | 0.024   | 0.038 | 0.038  |
| Niedzica         | 11              | 0.152             | 0.248 | 0.244  | 0.026   | 0.042 | 0.041  |
| Waksmund         | 12              | 0.077             | 0.126 | 0.124  | 0.013   | 0.021 | 0.021  |
